# Supplementary material
Source: publisher figshare collection journal article supplement (https://acs.figshare.com/ndownloader/files/9925453)
Supplement: Supplementary file 1 [file 9925453]

**Supporting Information for:**  
**Isotopically-Labeled Iodoacetamide-alkyne Probes for Quantitative  
Cysteine-Reactivity Profiling**

*Masahiro Abo, Chun Li, and Eranthie Weerapana\**

Department of Chemistry, Boston College, Chestnut Hill, Massachusetts 02467, United States

| <b>Table of Contents</b>                                         | <b>Page</b> |
|------------------------------------------------------------------|-------------|
| Supporting Figure S1. <sup>1</sup> H NMR spectrum of <b>1</b> .  | S2          |
| Supporting Figure S2. <sup>13</sup> C NMR spectrum of <b>1</b> . | S3          |
| Supporting Figure S3. <sup>1</sup> H NMR spectrum of <b>2</b> .  | S4          |
| Supporting Figure S4. <sup>13</sup> C NMR spectrum of <b>2</b> . | S5          |
| Supporting Figure S5. <sup>1</sup> H NMR spectrum of IA-light.   | S6          |
| Supporting Figure S6. <sup>13</sup> C NMR spectrum of IA-light.  | S7          |
| Supporting Figure S7. <sup>1</sup> H NMR spectrum of IA-heavy.   | S8          |
| Supporting Figure S8. <sup>13</sup> C NMR spectrum of IA-heavy.  | S9          |

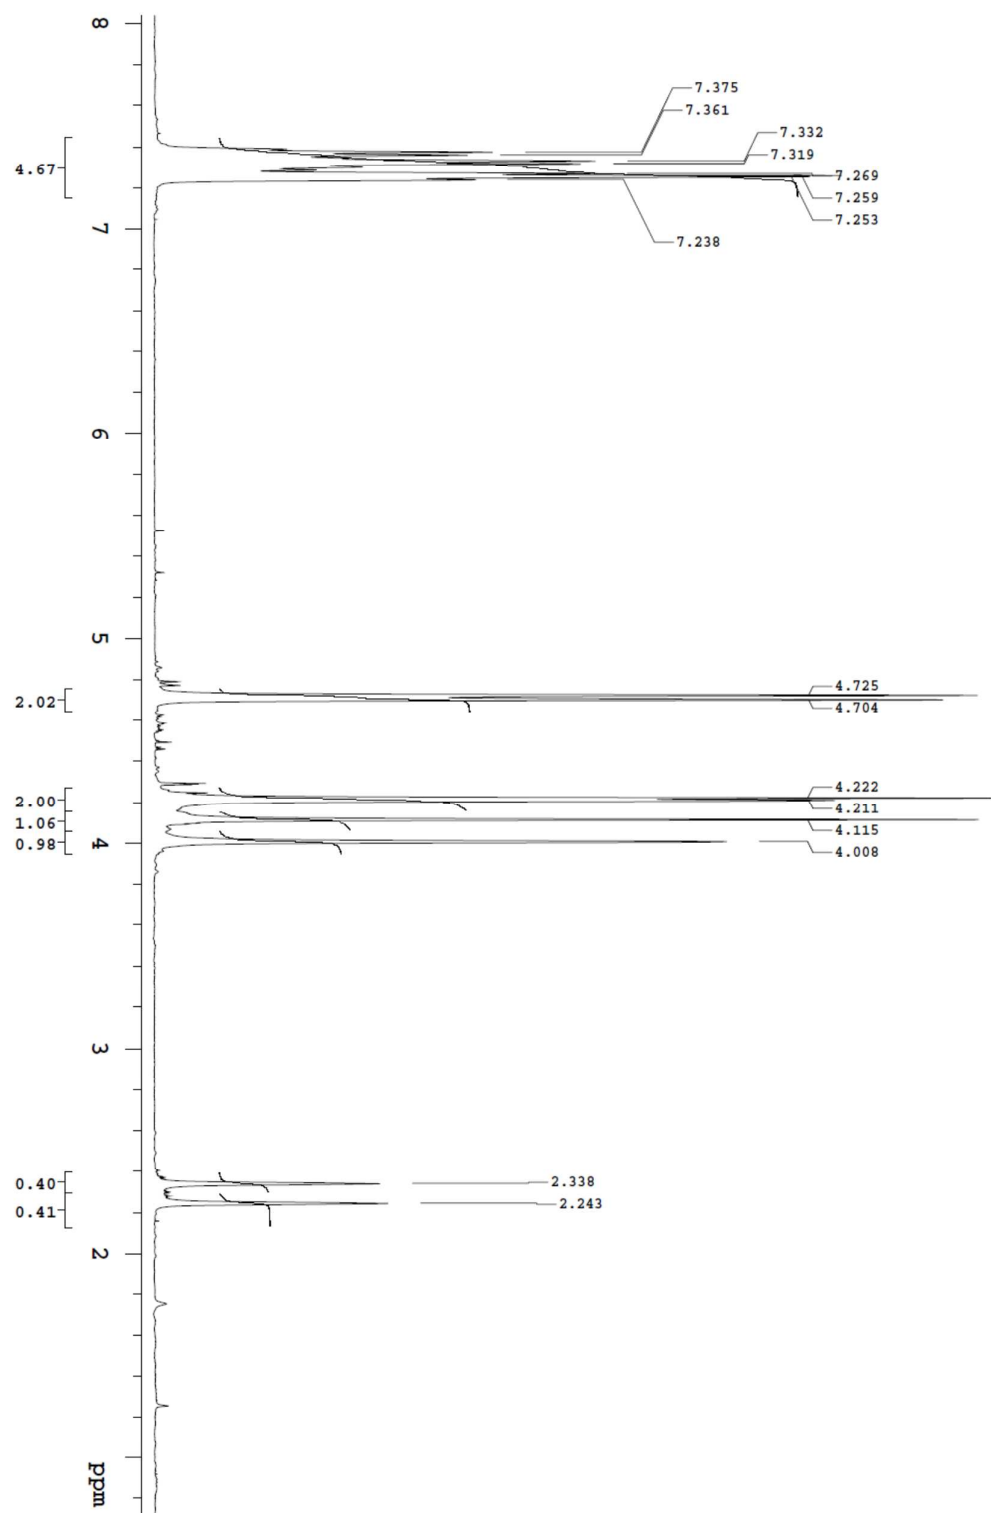

Supporting Figure S1. <sup>1</sup>H NMR spectrum of **1**

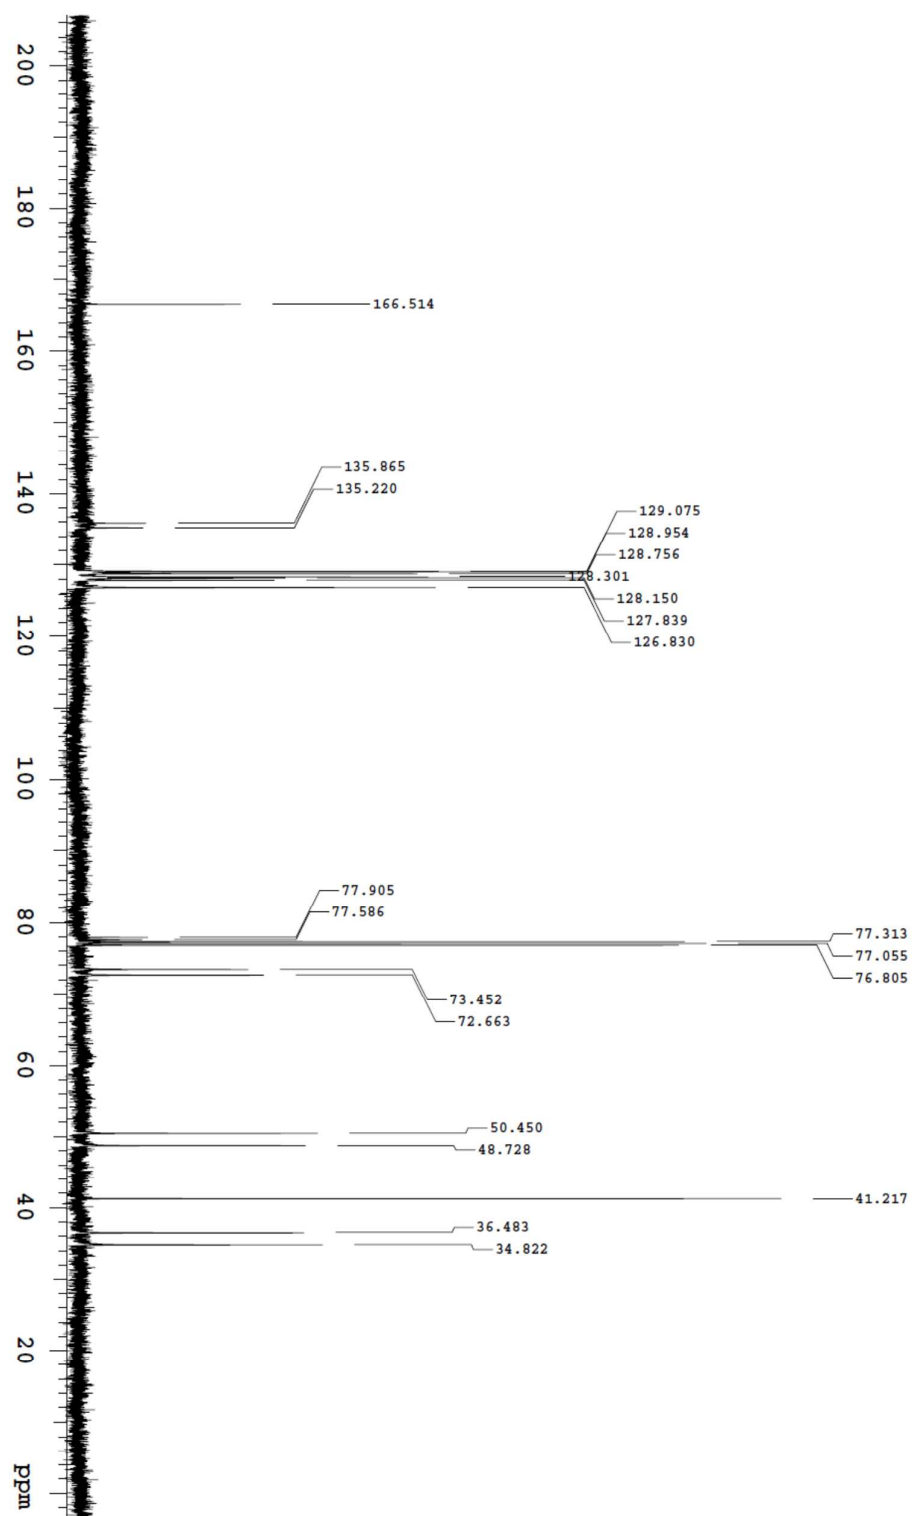

Supporting Figure S2. <sup>13</sup>C NMR spectrum of **1**.

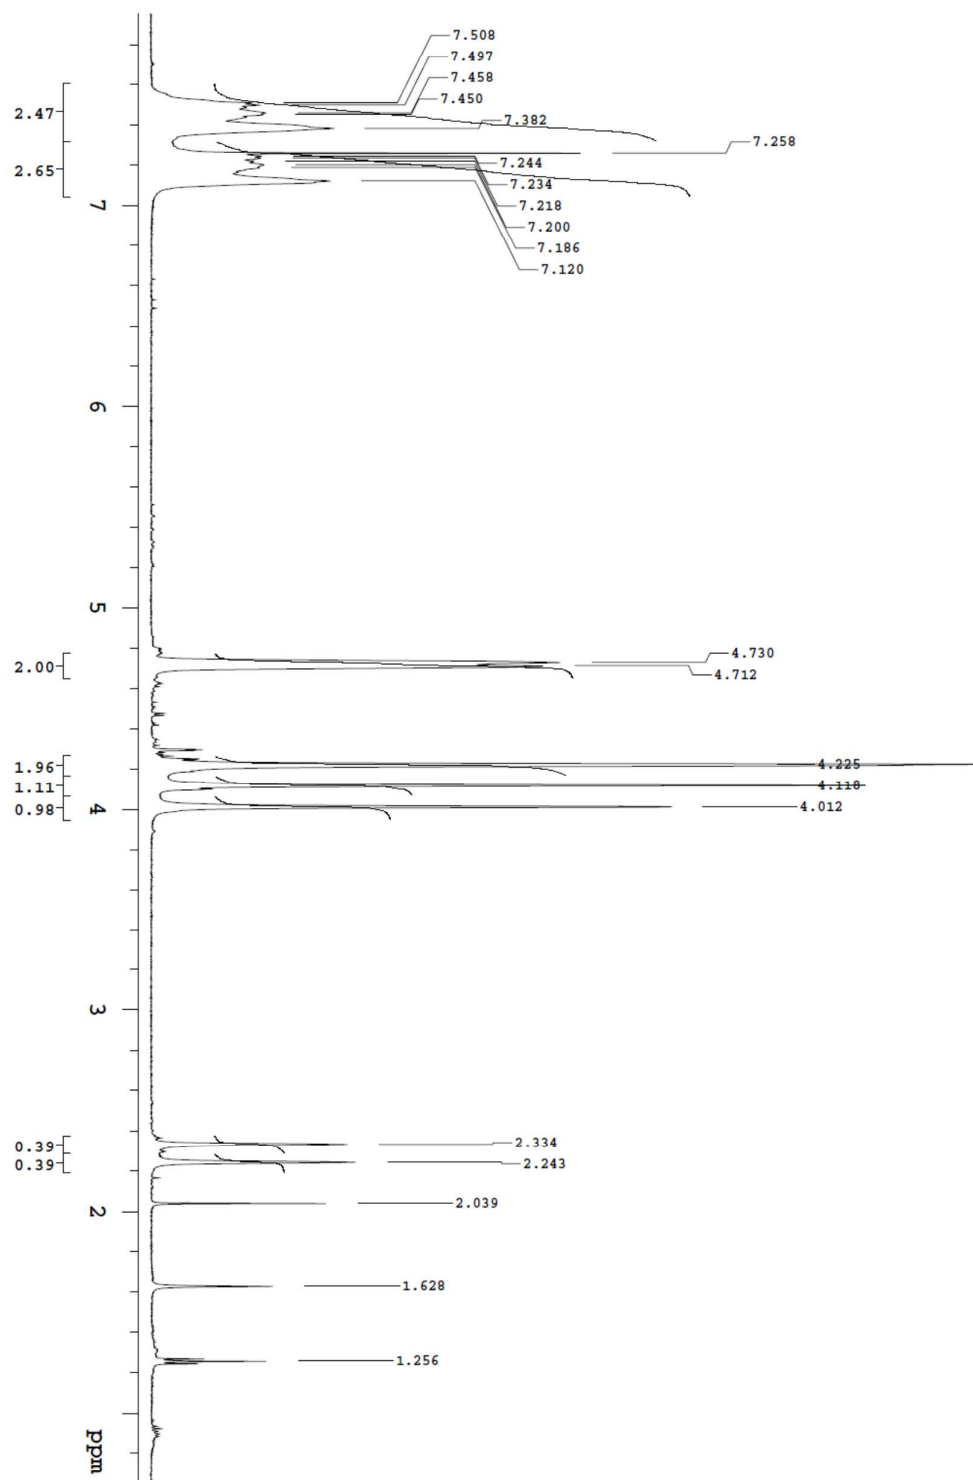

Supporting Figure S3. <sup>1</sup>H NMR spectrum of 2.

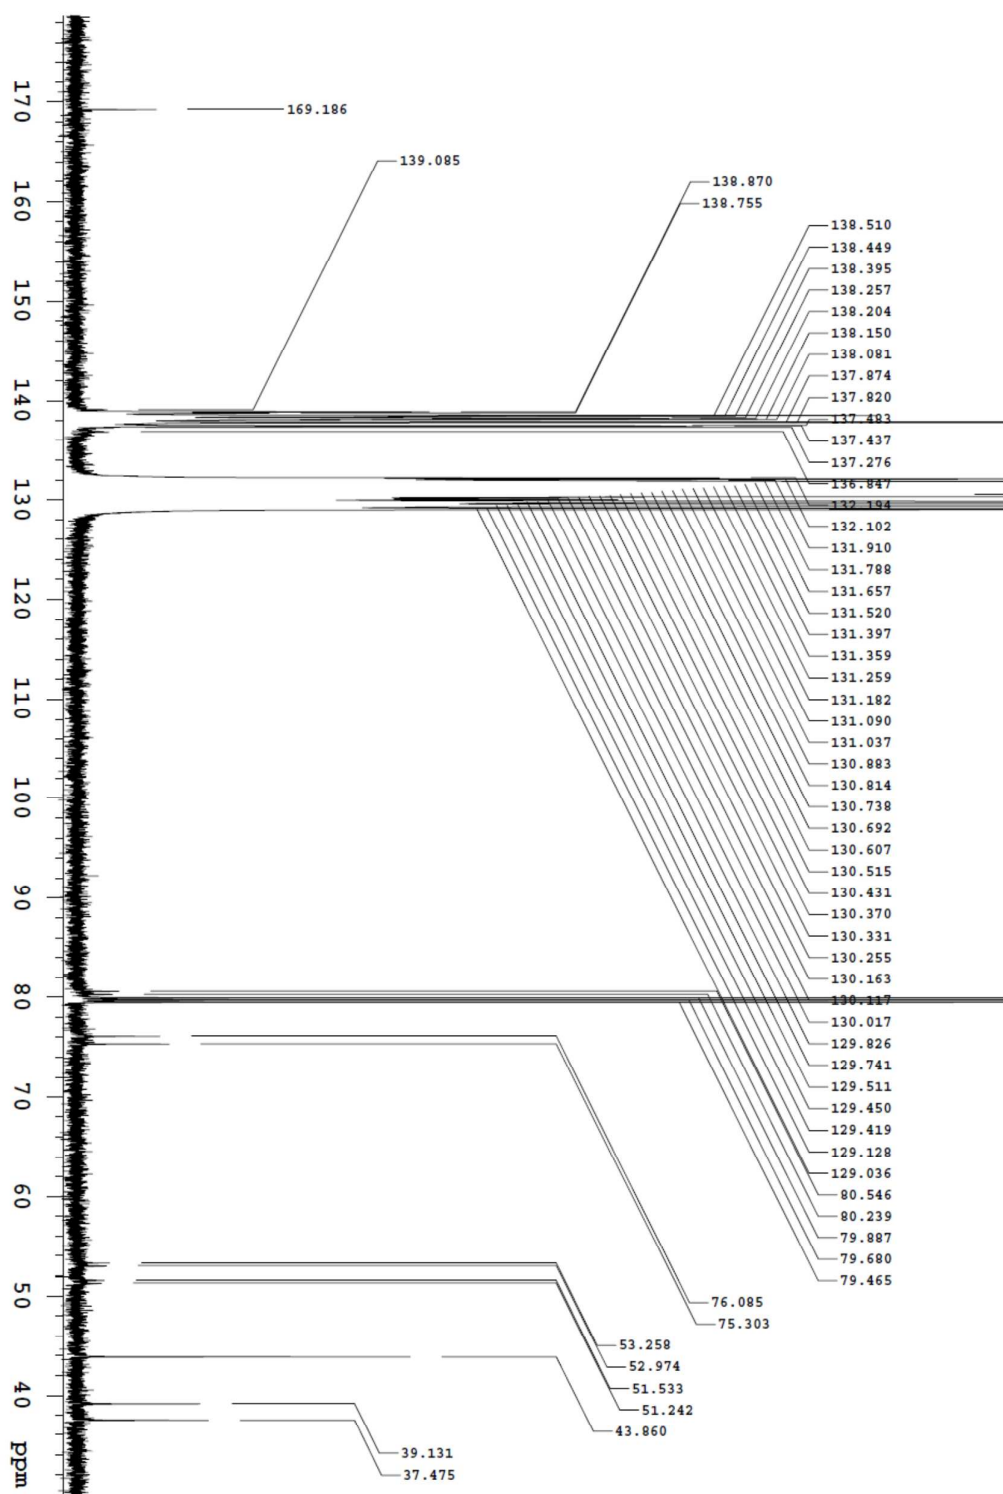

Supporting Figure S4.  $^{13}\text{C}$  NMR spectrum of **2**.

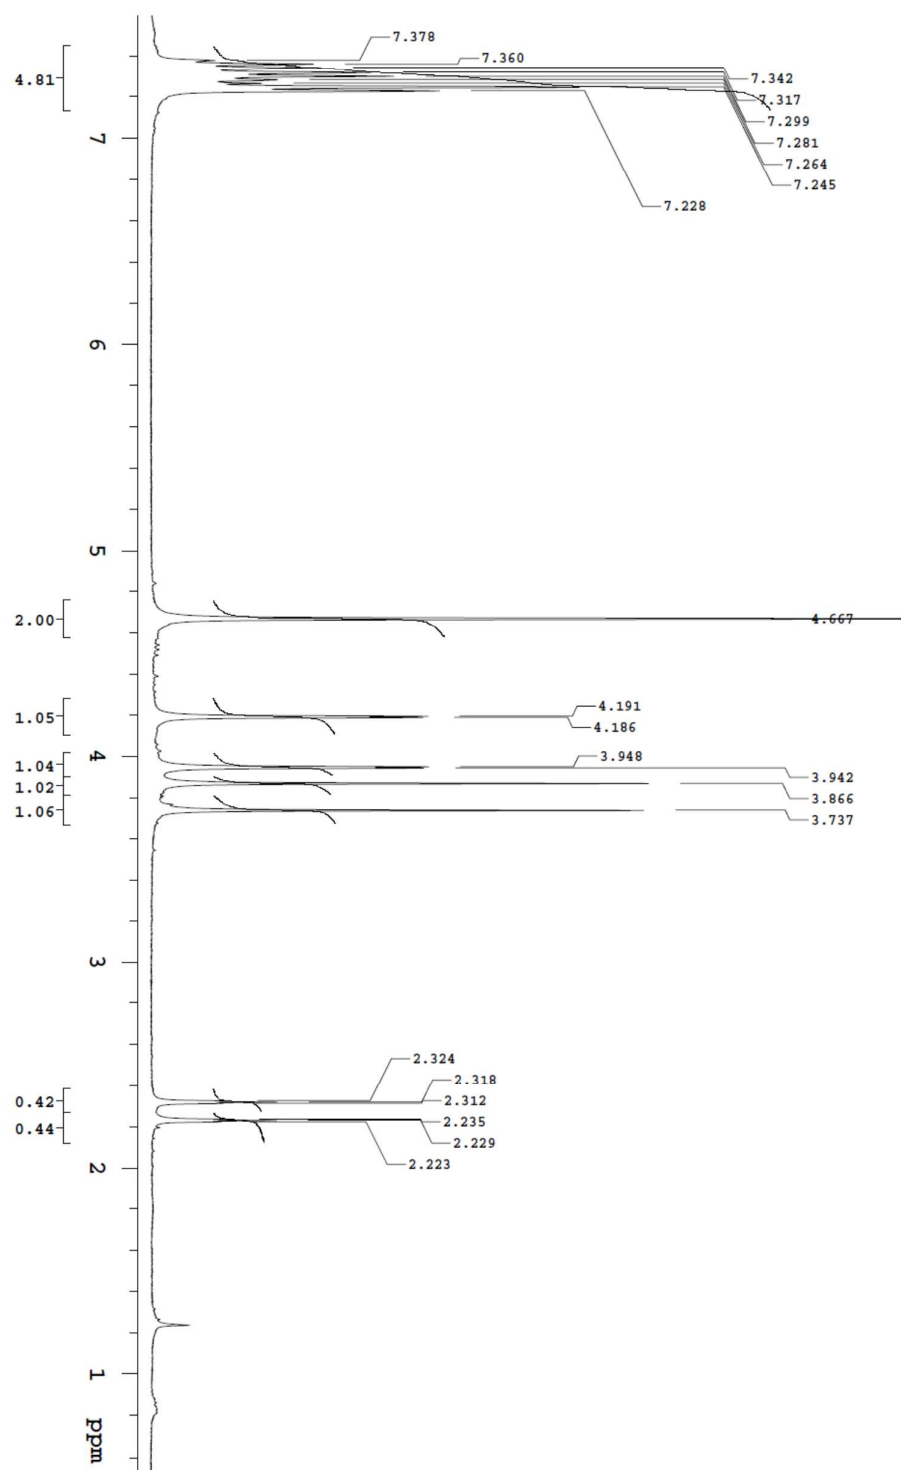

Supporting Figure S5. <sup>1</sup>H NMR spectrum of IA-light.

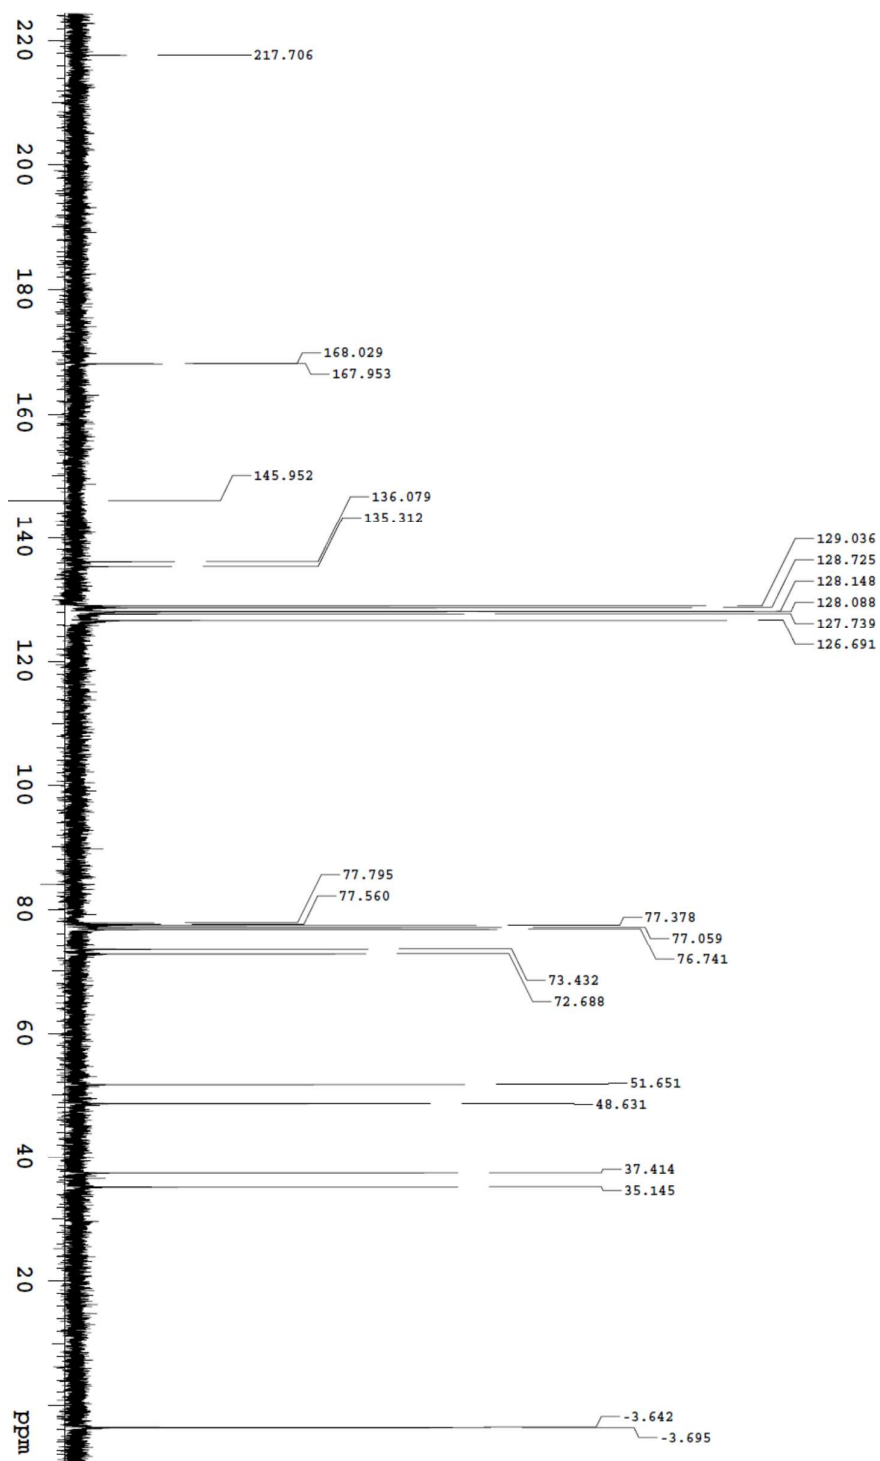

Supporting Figure S6. <sup>13</sup>C NMR of IA-light.

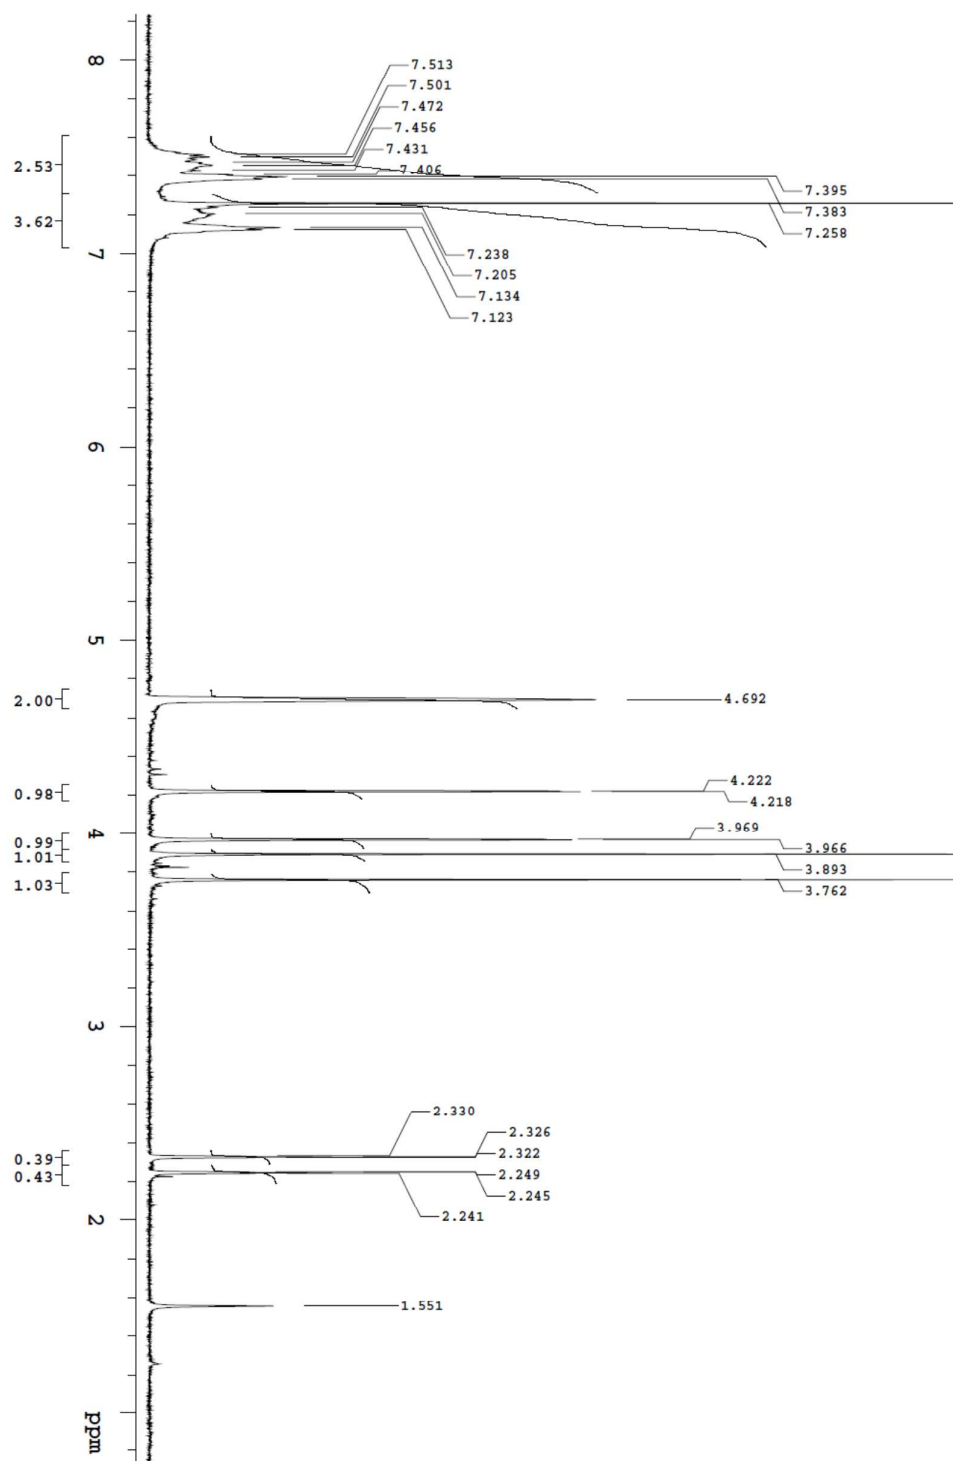

Supporting Figure S7.  $^1\text{H}$  NMR spectrum of IA-heavy.

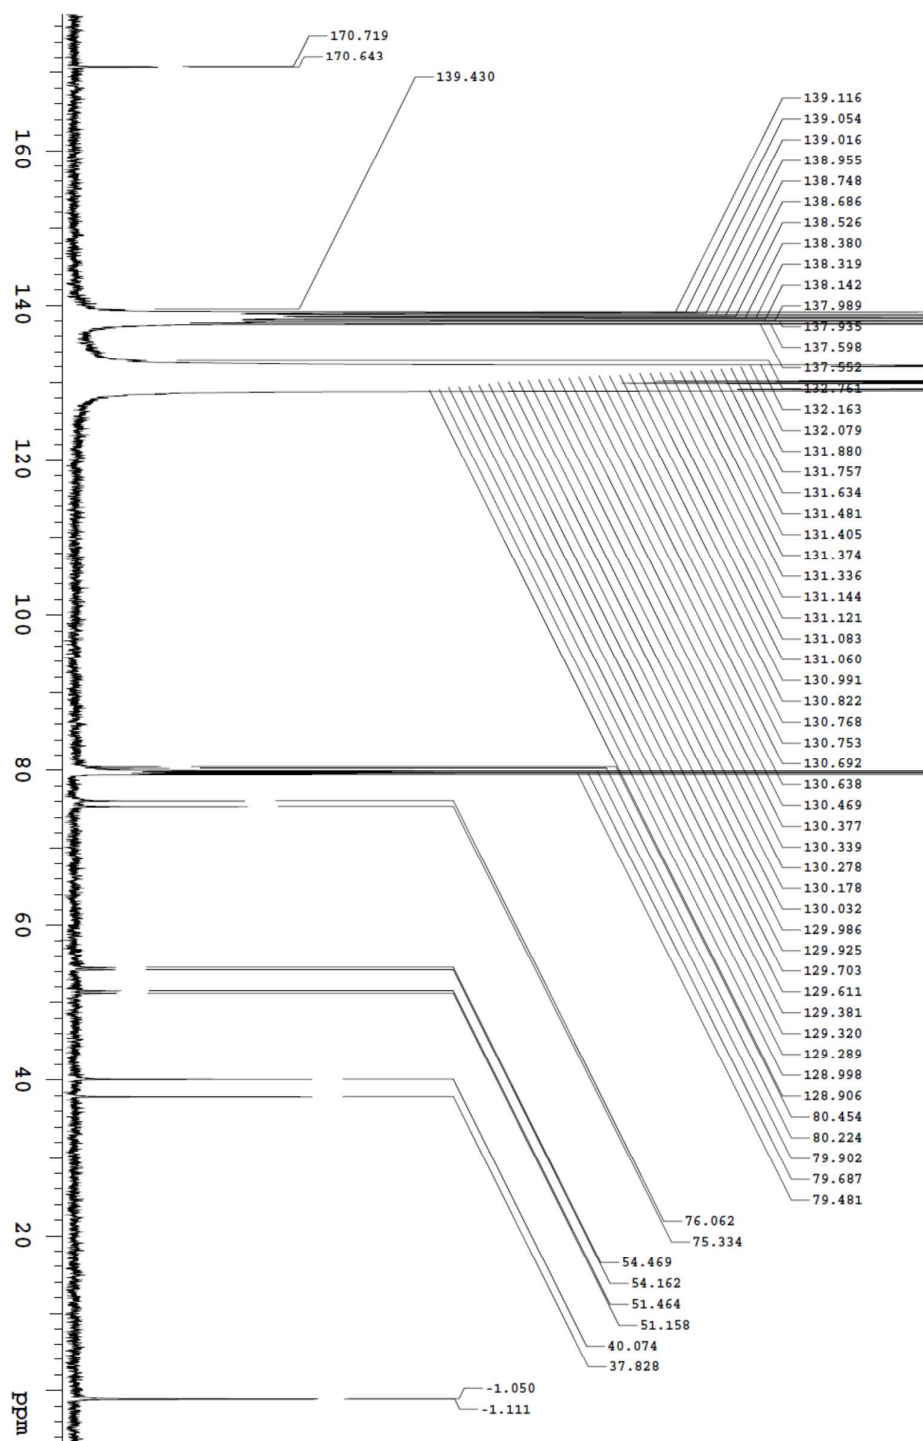

Supporting Figure S8. <sup>13</sup>C NMR spectrum of IA-heavy.
